# Supplementary material for: Design and Optimization of a Self-Assembling Complex Based on Microencapsulated Calcium Alginate and Glutathione (CAG) Using Response Surface Methodology
Source: MDPI journal article supplement (doi:10.3390/polym13132080), 2021-06-24
Supplement: s1 [file s1]

Design and optimization of a self-assembling complex based on  
microencapsulated calcium alginate and glutathione (CAG) using response surface  
methodology.

Table S1. Interaction effects of the treatments of. Formation of complex.

| Tukey's multiple comparisons test | Mean Diff. | 95% CI of diff.       | Significant | Summary |
|-----------------------------------|------------|-----------------------|-------------|---------|
| 1 vs. 2                           | -0,008000  | -0.01626 to 0.0002587 | No          | ns      |
| 1 vs. 3                           | -0,0130    | -0.02126 to -0.004741 | Yes         | *       |
| 1 vs. 4                           | -0,004000  | -0.01226 to 0.004259  | No          | ns      |
| 1 vs. 5                           | -0,01567   | -0.02393 to -0.007408 | Yes         | *       |
| 1 vs. 6                           | -0,02333   | -0.03159 to -0.01507  | Yes         | *       |
| 1 vs. 7                           | -0,01167   | -0.01993 to -0.003408 | Yes         | *       |
| 1 vs. 8                           | -0,02267   | -0.03093 to -0.01441  | Yes         | *       |
| 1 vs. 9                           | -0,0270    | -0.03526 to -0.01874  | Yes         | *       |
| 2 vs. 3                           | -0,005000  | -0.01326 to 0.003259  | No          | ns      |
| 2 vs. 4                           | 0,0040     | -0.004259 to 0.01226  | No          | ns      |
| 2 vs. 5                           | -0,007667  | -0.01593 to 0.0005920 | No          | ns      |
| 2 vs. 6                           | -0,01533   | -0.02359 to -0.007075 | Yes         | *       |
| 2 vs. 7                           | -0,003667  | -0.01193 to 0.004592  | No          | ns      |
| 2 vs. 8                           | -0,01467   | -0.02293 to -0.006408 | Yes         | *       |
| 2 vs. 9                           | -0,0190    | -0.02726 to -0.01074  | Yes         | *       |
| 3 vs. 4                           | 0,0090     | 0.0007413 to 0.01726  | Yes         | *       |
| 3 vs. 5                           | -0,002667  | -0.01093 to 0.005592  | No          | ns      |
| 3 vs. 6                           | -0,01033   | -0.01859 to -0.002075 | Yes         | *       |
| 3 vs. 7                           | 0,001333   | -0.006925 to 0.009592 | No          | ns      |
| 3 vs. 8                           | -0,009667  | -0.01793 to -0.001408 | Yes         | *       |
| 3 vs. 9                           | -0,0140    | -0.02226 to -0.005741 | Yes         | *       |
| 4 vs. 5                           | -0,01167   | -0.01993 to -0.003408 | Yes         | *       |
| 4 vs. 6                           | -0,01933   | -0.02759 to -0.01107  | Yes         | *       |
| 4 vs. 7                           | -0,007667  | -0.01593 to 0.0005920 | No          | ns      |
| 4 vs. 8                           | -0,01867   | -0.02693 to -0.01041  | Yes         | *       |
| 4 vs. 9                           | -0,0230    | -0.03126 to -0.01474  | Yes         | *       |
| 5 vs. 6                           | -0,007667  | -0.01593 to 0.0005920 | No          | ns      |
| 5 vs. 7                           | 0,004000   | -0.004259 to 0.01226  | No          | ns      |
| 5 vs. 8                           | -0,007000  | -0.01526 to 0.001259  | No          | ns      |
| 5 vs. 9                           | -0,01133   | -0.01959 to -0.003075 | Yes         | *       |
| 6 vs. 7                           | 0,01167    | 0.003408 to 0.01993   | Yes         | *       |
| 6 vs. 8                           | 0,0006667  | -0.007592 to 0.008925 | No          | ns      |
| 6 vs. 9                           | -0,003667  | -0.01193 to 0.004592  | No          | ns      |
| 7 vs. 8                           | -0,0110    | -0.01926 to -0.002741 | Yes         | *       |
| 7 vs. 9                           | -0,01533   | -0.02359 to -0.007075 | Yes         | *       |
| 8 vs. 9                           | -0,004333  | -0.01259 to 0.003925  | No          | ns      |

ANOVA test: (\*) represent statistical significance at  $p < 0.05$ , ns (not significance) (Tukey test).
